# Supplementary material
Source: publisher figshare collection journal article supplement (https://acs.figshare.com/ndownloader/files/12877904)
Supplement: Supplementary file 1 [file 12877904]

## Supporting Information

### **Washing-Free Displacement Immunosensor for Cortisol in Human Serum Containing Numerous Interfering Species**

Ponnusamy Nandhakumar,<sup>†</sup> Al-Monsur Jiaul Haque,<sup>†</sup> Nam-Sihk Lee,<sup>‡</sup> Young Ho Yoon,<sup>‡</sup> and Haesik Yang<sup>\*,†</sup>

<sup>†</sup>Department of Chemistry and Chemistry Institute for Functional Materials, Pusan National University, Busan 46241, Korea

<sup>‡</sup>EONE Laboratories, Incheon 22014, Korea

\*E-mail: hyang@pusan.ac.kr. Fax: (+82)-51-516-7421.

## Table of Content

1. Preparation of DI-Modified ITO Electrodes.
2. Procedure of Displacement Assay with Washing.
3. Procedure of Competitive Assay with Washing.
4. Procedure of Washing-Free Competitive Assay.

**Figure S-1.** Histogram of the charge values measured at 100 s in the chronocoulograms obtained at different applied potentials (0.05 V, 0.10 V, 0.15 V and 0.2 V) after an incubation period of 10 min at 25 °C in PBS containing 10  $\mu$ M Os(bpy)<sub>2</sub>Cl<sub>2</sub> and 1.0 mM NADH.

**Figure S-2.** Chronocoulograms for zero and 1 nM cortisol obtained at an applied potential of 0.05 V after an incubation period of 10 min at 25 °C in PBS containing 10  $\mu$ M Os(bpy)<sub>2</sub>Cl<sub>2</sub> and 1.0 mM NADH for the detection of zero and 1 nM cortisol using four different methods: (a) washing-free displacement assay, (b) displacement assay with washing, (c) washing-free competitive assay, and (d) competitive assay with washing.

**Table S-1.** Comparison data for chronocoulograms shown in Figure 5. The charge values measured at 100 s were compared.

**Table S-2.** Comparison of the developed method with other detection methods.

**Preparation of DI-Modified ITO Electrodes.** 70  $\mu\text{L}$  of PBSB containing 100  $\mu\text{g/mL}$  of DI was dropped on bare ITO electrodes for 2 h at 4  $^{\circ}\text{C}$  and then washed with rinsing buffer.

**Procedure of Displacement Assay with Washing.** 70  $\mu\text{L}$  of TBSB containing 10  $\mu\text{g/mL}$  anti-cortisol IgG-DI conjugate was dropped onto ITO electrodes modified with cortisol BSA and BSA (cortisol-BSA:BSA = 1:10). The electrodes were maintained in the treated state for 30 min at 25  $^{\circ}\text{C}$ , followed by washing with rinsing buffer. For the displacement assay, 70  $\mu\text{L}$  of PBS containing 1 nM cortisol was dropped onto the electrodes. This state maintained for 30 min at 25  $^{\circ}\text{C}$ , followed by washing with rinsing buffer. Finally, chronocoulograms were obtained at an applied potential of 0.05 V after an incubation period of 10 min at 25  $^{\circ}\text{C}$  in PBS containing 10  $\mu\text{M}$   $\text{Os}(\text{bpy})_2\text{Cl}_2$  and 1.0 mM NADH.

**Procedure of Competitive Assay with Washing.** 70  $\mu\text{L}$  of TBSB containing 10  $\mu\text{g/mL}$  anti-cortisol IgG-DI conjugate and 1 nM cortisol was dropped onto ITO electrodes modified with cortisol BSA and BSA (cortisol-BSA:BSA = 1:10). The electrodes were maintained in the treated state for 30 min at 25  $^{\circ}\text{C}$ , followed by washing with rinsing buffer. Finally, chronocoulograms were obtained at an applied potential of 0.05 V after an incubation period of 10 min at 25  $^{\circ}\text{C}$  in PBS containing 10  $\mu\text{M}$   $\text{Os}(\text{bpy})_2\text{Cl}_2$  and 1.0 mM NADH.

**Procedure of Washing-Free Competitive Assay.** 1 mL of TBSB containing 1  $\mu\text{g/mL}$  anti-cortisol IgG-DI conjugate, 1 nM cortisol, 10  $\mu\text{M}$   $\text{Os}(\text{bpy})_2\text{Cl}_2$ , and 1.0 mM NADH was dropped onto ITO electrodes modified with cortisol BSA and BSA (cortisol-BSA:BSA = 1:10). The electrodes were maintained in the treated state for 10 min at 25  $^{\circ}\text{C}$ . Finally, chronocoulograms were obtained at an applied potential of 0.05 V.

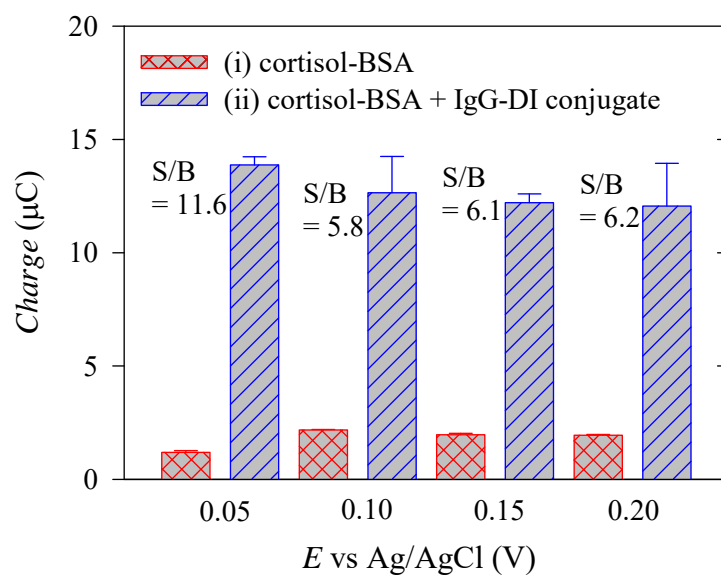

**Figure S-1.** Histogram of the charge values measured at 100 s in the chronocoulograms obtained at different applied potentials (0.05 V, 0.10 V, 0.15 V and 0.2 V) after an incubation period of 10 min at 25 °C in PBS containing 10  $\mu\text{M}$   $\text{Os}(\text{bpy})_2\text{Cl}_2$  and 1.0 mM NADH.

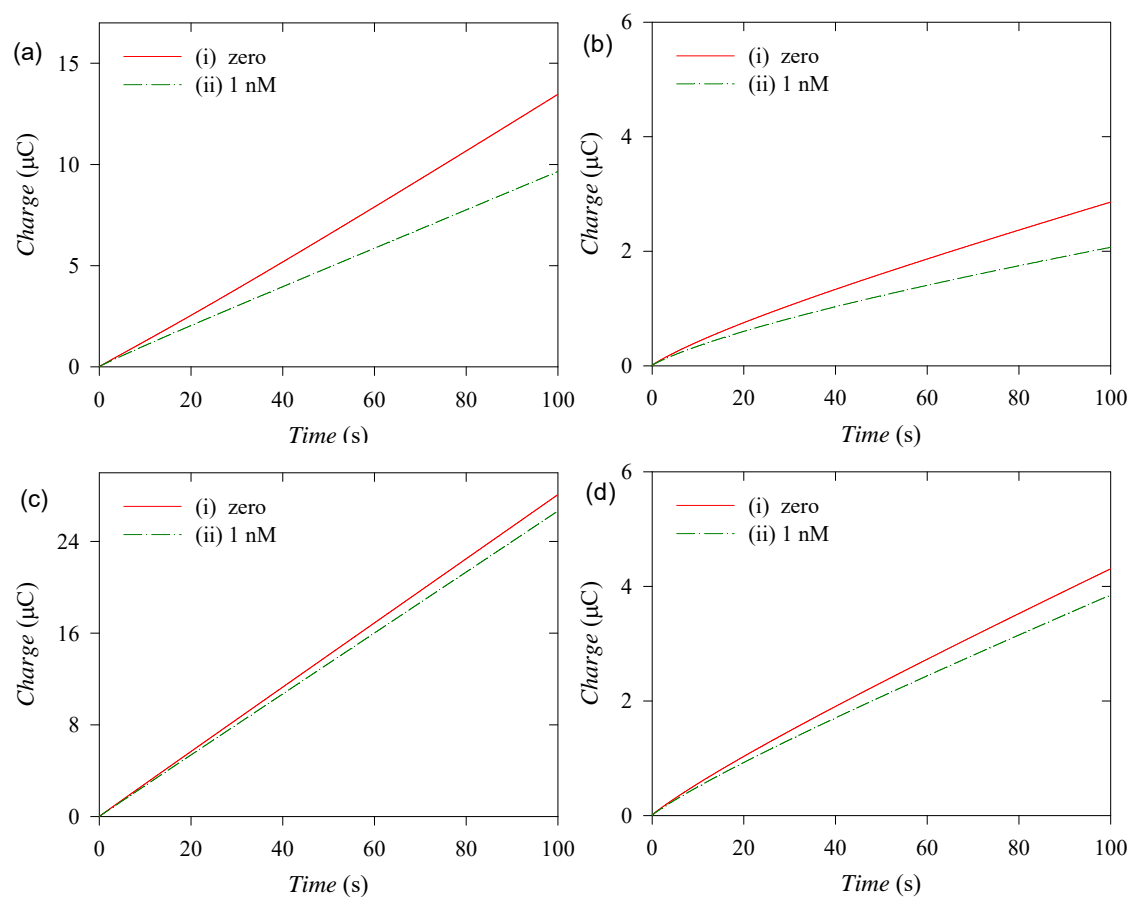

**Figure S-2.** Chronocoulograms obtained at an applied potential of 0.05 V after an incubation period of 10 min at 25 °C in PBS containing 10  $\mu\text{M}$   $\text{Os}(\text{bpy})_2\text{Cl}_2$  and 1.0 mM NADH, for the detection of zero and 1 nM cortisol using four different methods: (a) washing-free displacement assay, (b) displacement assay with washing, (c) washing-free competitive assay, and (d) competitive assay with washing.

**Table S-1.** Comparison data for chronocoulograms shown in Figure 5. The charge values measured at 100 s were compared.

| Condition<br>(cortisol-BSA:<br>BSA) | Bare<br>( $\mu\text{C}$ ) | Harsh<br>washing ( $\mu\text{C}$ ) | Zero<br>( $\mu\text{C}$ ) | 100 $\mu\text{M}$<br>cortisol<br>( $\mu\text{C}$ ) |
|-------------------------------------|---------------------------|------------------------------------|---------------------------|----------------------------------------------------|
| 1:0                                 | 1.08                      | 2.14                               | 8.89                      | 7.93                                               |
| 1:3                                 | 1.29                      | 3.16                               | 11.2                      | 8.16                                               |
| 1:10                                | 1.23                      | 2.17                               | 13.5                      | 6.59                                               |
| 1:30                                | 1.07                      | 2.41                               | 12.3                      | 7.68                                               |

**Table S-2.** Comparison of the developed method with other detection methods.

| Ref.         | Method                                       | Preparation<br>period (after<br>sample<br>injection) | Detection limit  | Detection range           |
|--------------|----------------------------------------------|------------------------------------------------------|------------------|---------------------------|
| This<br>work | Chronocoulometry                             | 12 min                                               | 30 pM            | 30 pM – 1 $\mu\text{M}$   |
| 1            | Square Wave<br>Voltammetry                   | -                                                    | 10 $\mu\text{M}$ | 10 – 80 $\mu\text{M}$     |
| 2            | Cyclic Voltammetry                           | 35 min                                               | 28 pM            | 28 pM – 1.4 $\mu\text{M}$ |
| 3            | Luminescence                                 | 30 min                                               | 100 pM           | 100 pM – 10 $\mu\text{M}$ |
| 4            | Fluorescence                                 | 3 h                                                  | 300 pM           | 300 pM – 30 nM            |
| 5            | Electrochemical<br>Impedance<br>Spectroscopy | 30 min                                               | 1 pM             | 1 pM – 10 nM              |
| 6            | Fluorescence                                 | 3 h                                                  | 28 nM            | 28 nM – 3 $\mu\text{M}$   |
| 7            | Enzyme<br>Immunoassay                        | Overnight                                            | 1 pM/well        | 1 – 280 pM/well           |

## References

- (1) Kumar, A.; Aravamudhan, S.; Gordic, M.; Bhansali, S.; Mohapatra, S. S. *Biosens. Bioelectron.* **2007**, *22*, 2138–2144.
- (2) Kaushik, A.; Yndart, A.; Jayant, R. D.; Sagar, V.; Atluri, V.; Bhansali, S.; Nair, M. *Int. J. Nanomedicine* **2015**, *10*, 677–685.
- (3) Rowe, L.; Deo, S.; Shofner, J.; Ensor, M.; Daunert, S. *Bioconjugate Chem.* **2007**, *18*, 1772–1777.
- (4) Petkus, M. M.; McLauchlin, M.; Vuppu, A. K.; Rios, L.; Garcia, A. A.; Hayes, M. A. *Anal. Chem.* **2006**, *78*, 1405–1411.
- (5) Arya, S. K.; Chornokur, G.; Venugopal, M.; Bhansali, S. *Analyst* **2010**, *135*, 1941–1946.
- (6) Zhou, J. C.; Chuang, M. H.; Lan, E. H.; Dunn, B.; Gillman, P. L.; Smith, S. M. *J. Mater. Chem.* **2004**, *14*, 2311–2316.
- (7) Sarkar, M.; Das, B. C.; Bora, B. D.; Kumar, V.; Mohan, K.; Meyer, H. H. D.; Prakash, B. S. *Gen. Comp. Endocrinol.* **2007**, *154*, 85–90.
